# Supplementary material for: Application of Whole Genome Sequencing and Pan-Family Multi-Locus Sequence Analysis to Characterize Relationships Within the Family Brucellaceae
Source: PubMed Central journal article supplement (PMC7372191; doi:10.3389/fmicb.2020.01329), 2020-07-14
Supplement: Table_1.pdf [file Table_1.pdf]

## Supplementary Table S1

**Table S1.** *De novo* assembly statistics for *Brucellaceae* type strains for which whole genome sequencing data was generated within this study.

| Species                               | Strain                  | % GC content | Length (bp) | Contigs | N50    | CDS  | rRNA | tRNA | Fold coverage |
|---------------------------------------|-------------------------|--------------|-------------|---------|--------|------|------|------|---------------|
| <i>Daeguia caeni</i>                  | CCUG 54520 <sup>T</sup> | 56.2         | 3245719     | 127     | 85870  | 3030 | 3    | 48   | 91            |
| <i>Falsoleobacter ovis</i>            | LMG 27356 <sup>T</sup>  | 50.4         | 3267899     | 43      | 295525 | 3122 | 3    | 45   | 36            |
| <i>Mycoplana dimorpha</i>             | DSM 7138 <sup>T</sup>   | 63.5         | 4590109     | 39      | 347281 | 4217 | 3    | 50   | 55            |
| <i>Mycoplana ramosa</i>               | DSM 7292 <sup>T</sup>   | 63.5         | 4466277     | 53      | 271800 | 4133 | 3    | 50   | 126           |
| <i>Ochrobactrum ciceri</i>            | DSM 22292 <sup>T</sup>  | 57.6         | 4571133     | 42      | 475114 | 4352 | 3    | 52   | 76            |
| <i>Ochrobactrum cytisi</i>            | DSM 19778 <sup>T</sup>  | 55.6         | 5792978     | 81      | 223698 | 5542 | 3    | 51   | 114           |
| <i>Ochrobactrum daejeonense</i>       | JCM 16234 <sup>T</sup>  | 58.3         | 4648313     | 86      | 149521 | 4447 | 3    | 52   | 130           |
| <i>Ochrobactrum endophyticum</i>      | DSM 29930 <sup>T</sup>  | 58.4         | 4932768     | 136     | 120234 | 4705 | 3    | 53   | 181           |
| <i>Ochrobactrum grignonense</i>       | LMG 18954 <sup>T</sup>  | 53.5         | 4948799     | 64      | 286645 | 4656 | 6    | 50   | 64            |
| <i>Ochrobactrum haematophilum</i>     | CIP 109452 <sup>T</sup> | 56           | 5508453     | 69      | 216671 | 5213 | 3    | 53   | 57            |
| <i>Ochrobactrum lupini</i>            | DSM 16930 <sup>T</sup>  | 55.4         | 5591304     | 71      | 152284 | 5377 | 3    | 49   | 75            |
| <i>Ochrobactrum oryzae</i>            | DSM 17471 <sup>T</sup>  | 55.9         | 4773851     | 84      | 237924 | 4529 | 3    | 52   | 103           |
| <i>Ochrobactrum pituitosum</i>        | DSM 22207 <sup>T</sup>  | 53.1         | 5160499     | 47      | 377454 | 4949 | 3    | 51   | 88            |
| <i>Ochrobactrum pseudogrignonense</i> | CIP 109451 <sup>T</sup> | 53.4         | 5542201     | 79      | 281360 | 5313 | 3    | 51   | 73            |

|                                           |                         |      |         |     |        |      |   |    |     |
|-------------------------------------------|-------------------------|------|---------|-----|--------|------|---|----|-----|
| <i>Ochrobactrum rhizosphaerae</i>         | DSM 19824 <sup>T</sup>  | 52.8 | 4904656 | 47  | 347797 | 4628 | 3 | 47 | 114 |
| <i>Ochrobactrum thiophenivorans</i>       | DSM 7216 <sup>T</sup>   | 51.1 | 4369569 | 86  | 168741 | 4113 | 3 | 48 | 118 |
| <i>Paenochrobactrum gallinarii</i>        | CCUG 57736 <sup>T</sup> | 49.2 | 3401076 | 113 | 150153 | 3150 | 3 | 44 | 56  |
| <i>Paenochrobactrum glaciei</i>           | JCM 15115 <sup>T</sup>  | 48.9 | 3703195 | 43  | 389832 | 3441 | 3 | 48 | 77  |
| <i>Paenochrobactrum pullorum</i>          | LMG 28095 <sup>T</sup>  | 48.6 | 3663848 | 57  | 201991 | 3454 | 3 | 53 | 29  |
| <i>Pseudochrobactrum asaccharolyticum</i> | CCUG 46016 <sup>T</sup> | 50.2 | 4648602 | 48  | 451575 | 4246 | 3 | 53 | 114 |
| <i>Pseudochrobactrum kiredjianiae</i>     | DSM 19762 <sup>T</sup>  | 50.4 | 4413605 | 63  | 461670 | 3934 | 3 | 49 | 136 |
| <i>Pseudochrobactrum lubricantis</i>      | CCUG 56963 <sup>T</sup> | 51.9 | 4238784 | 60  | 439369 | 3930 | 3 | 48 | 111 |
| <i>Pseudochrobactrum saccharolyticum</i>  | CCUG 33852 <sup>T</sup> | 51.2 | 3757080 | 25  | 730432 | 3361 | 3 | 47 | 76  |
