# Supplementary material for: Application of Whole Genome Sequencing and Pan-Family Multi-Locus Sequence Analysis to Characterize Relationships Within the Family Brucellaceae
Source: PubMed Central journal article supplement (PMC7372191; doi:10.3389/fmicb.2020.01329), 2020-07-14
Supplement: Table_2.pdf [file Table_2.pdf]

## Supplementary Table S2

**Table S2.1** Primers used for amplification and sequencing of six loci included in the pan-family MLSA scheme

| Locus name  | Putative function                        | Primer direction | Primer sequence (5'-3') |
|-------------|------------------------------------------|------------------|-------------------------|
| <i>gpd</i>  | glyceraldehyde 3-phosphate dehydrogenase | F                | TGGAATGCACCGGCATYTTCA   |
|             |                                          | R                | TCGSACATRCGGYTSGAGAAGC  |
| <i>dnaK</i> | chaperone protein                        | F                | TCGARGTGAAGTCSACCAAYG   |
|             |                                          | R                | ACTTCTTSGTCGGGATCGTSG   |
| <i>trpE</i> | anthranilate synthase                    | F                | GGIGCICCRAARCTSTGGGC    |
|             |                                          | R                | CGRATGCGIGAIGGYTTSCC    |
| <i>csdB</i> | cysteine desulferase                     | F                | GGMGGATSRTRTAGGTGAC     |
|             |                                          | R                | GARTAYGCCAAYGTSCATCG    |
| <i>leuA</i> | 2-isopropylmalate synthase               | F                | CGCTGTTCGGCAATGGCGAGC   |
|             |                                          | R                | GCTGCAGCGAGTGYTCGGAAT   |
| <i>acnA</i> | aconitate hydratase                      | F                | CTGYGGYTTCTTCCCGGT      |
|             |                                          | R                | GTCCCAKGCRTAGGTCTG      |

**Table S2.2** Characteristics of the six loci included in the pan-family MLSA scheme, across the 43 *Brucellaceae* type species analysed

| Locus        | Length (bp) | Mean % GC content | Polymorphic sites (%) <sup>a</sup> | $\pi$  |
|--------------|-------------|-------------------|------------------------------------|--------|
| <i>gpd</i>   | 589         | 57.8              | 290 (49.24)                        | 0.1403 |
| <i>dnaK</i>  | 470         | 57.9              | 199 (42.34)                        | 0.1256 |
| <i>trpE</i>  | 486         | 57.6              | 260 (53.50)                        | 0.1975 |
| <i>csdB</i>  | 487         | 54.5              | 250 (51.33)                        | 0.1780 |
| <i>leuA</i>  | 482         | 54.5              | 237 (49.17)                        | 0.1602 |
| <i>acnA</i>  | 490         | 59.4              | 219 (44.69)                        | 0.1412 |
| Concatenated | 3004        | 57.0              | 1453 (48.37)                       | 0.1565 |

<sup>(a)</sup> Polymorphic sites observed amongst 43 *Brucellaceae* type strains analysed;  $\pi$  = nucleotide diversity
