# Supplementary material for: Application of Whole Genome Sequencing and Pan-Family Multi-Locus Sequence Analysis to Characterize Relationships Within the Family Brucellaceae
Source: PubMed Central journal article supplement (PMC7372191; doi:10.3389/fmicb.2020.01329), 2020-07-14
Supplement: Table_4.pdf [file Table_4.pdf]

## Supplementary Table S4

**Table S4.1.** NCBI GenBank accession numbers for MLSA data generated for type strains

| Species                 | Strain ID               | <i>gpd</i> | <i>dnaK</i> | <i>trpE</i> | <i>csdB</i> | <i>leuA</i> | <i>acnA</i> |
|-------------------------|-------------------------|------------|-------------|-------------|-------------|-------------|-------------|
| <i>B. abortus</i>       | NCTC 10093 <sup>T</sup> | _ a        | _ a         | _ a         | _ a         | _ a         | _ a         |
| <i>B. canis</i>         | NCTC 10854 <sup>T</sup> | _ a        | _ a         | _ a         | _ a         | _ a         | _ a         |
| <i>B. ceti</i>          | NCTC 12891 <sup>T</sup> | _ a        | _ a         | _ a         | _ a         | _ a         | _ a         |
| <i>B. inopinata</i>     | BO1 <sup>T</sup>        | _ a        | _ a         | _ a         | _ a         | _ a         | _ a         |
| <i>B. melitensis</i>    | NCTC 10094 <sup>T</sup> | _ a        | _ a         | _ a         | _ a         | _ a         | _ a         |
| <i>B. microti</i>       | CCM 4915 <sup>T</sup>   | _ a        | _ a         | _ a         | _ a         | _ a         | _ a         |
| <i>B. neotomae</i>      | NCTC 10084 <sup>T</sup> | _ a        | _ a         | _ a         | _ a         | _ a         | _ a         |
| <i>B. ovis</i>          | NCTC 10512 <sup>T</sup> | _ a        | _ a         | _ a         | _ a         | _ a         | _ a         |
| <i>B. papionis</i>      | NCTC 13660 <sup>T</sup> | _ a        | _ a         | _ a         | _ a         | _ a         | _ a         |
| <i>B. pinnipedialis</i> | NCTC 12890 <sup>T</sup> | _ a        | _ a         | _ a         | _ a         | _ a         | _ a         |
| <i>B. suis</i>          | NCTC 10316 <sup>T</sup> | _ a        | _ a         | _ a         | _ a         | _ a         | _ a         |
| <i>B. vulpis</i>        | DSM 101715 <sup>T</sup> | _ a        | _ a         | _ a         | _ a         | _ a         | _ a         |
| <i>D. caeni</i>         | CCUG 54520 <sup>T</sup> | MT637241   | MT637267    | MT637295    | MT637322    | MT637350    | MT637378    |
| <i>F. ovis</i>          | LMG 27356 <sup>T</sup>  | MT637242   | MT637268    | MT637296    | MT637323    | MT637351    | MT637379    |
| <i>M. dimorpha</i>      | DSM 7138 <sup>T</sup>   | MT637243   | MT637269    | MT637297    | MT637324    | MT637352    | MT637380    |
| <i>M. ramosa</i>        | DSM 7292 <sup>T</sup>   | MT637244   | MT637270    | MT637298    | MT637325    | MT637353    | MT637381    |
| <i>O. anthropi</i>      | LMG 3331 <sup>T</sup>   | MT637245   | MT637271    | MT637299    | MT637326    | MT637354    | MT637382    |
| <i>O. ciceri</i>        | DSM 22292 <sup>T</sup>  | MT637246   | MT637272    | MT637300    | MT637327    | MT637355    | MT637383    |
| <i>O. cytisi</i>        | DSM 19778 <sup>T</sup>  | MT637247   | MT637273    | MT637301    | MT637328    | MT637356    | MT637384    |
| <i>O. daejeonense</i>   | JCM 16234 <sup>T</sup>  | MT637248   | MT637274    | MT637302    | MT637329    | MT637357    | MT637385    |
| <i>O. gallinifaecis</i> | DSM 15295 <sup>T</sup>  | MT637249   | MT637275    | MT637303    | MT637330    | MT637358    | MT637386    |
| <i>O. grignonense</i>   | LMG 18954 <sup>T</sup>  | MT637250   | MT637276    | MT637304    | MT637331    | MT637359    | MT637387    |
| <i>O. haematophilum</i> | CIP 109452 <sup>T</sup> | _ b        | MT637277    | MT637305    | MT637332    | MT637360    | MT637388    |

|                             |                         |                |          |                |          |          |          |
|-----------------------------|-------------------------|----------------|----------|----------------|----------|----------|----------|
| <i>O. intermedium</i>       | LMG 3301 <sup>T</sup>   | MT637251       | MT637278 | MT637306       | MT637333 | MT637361 | MT637389 |
| <i>O. lupini</i>            | DSM 16930 <sup>T</sup>  | MT637252       | MT637279 | MT637307       | MT637334 | MT637362 | MT637390 |
| <i>O. oryzae</i>            | DSM 17471 <sup>T</sup>  | MT637253       | MT637280 | MT637308       | MT637335 | MT637363 | MT637391 |
| <i>O. pecoris</i>           | CCUG 60088 <sup>T</sup> | MT637254       | MT637281 | MT637309       | MT637336 | MT637364 | MT637392 |
| <i>O. pituitosum</i>        | DSM 22207 <sup>T</sup>  | MT637255       | MT637282 | MT637310       | MT637337 | MT637365 | MT637393 |
| <i>O. pseudintermedium</i>  | DSM 17490 <sup>T</sup>  | MT637256       | MT637283 | MT637311       | MT637338 | MT637366 | MT637394 |
| <i>O. pseudogrignonense</i> | CIP 109451 <sup>T</sup> | MT637257       | MT637284 | MT637312       | MT637339 | MT637367 | MT637395 |
| <i>O. rhizosphaerae</i>     | DSM 19824 <sup>T</sup>  | - <sup>b</sup> | MT637285 | MT637313       | MT637340 | MT637368 | MT637396 |
| <i>O. thiophenivorans</i>   | DSM 7216 <sup>T</sup>   | MT637258       | MT637286 | MT637314       | MT637341 | MT637369 | MT637397 |
| <i>O. tritici</i>           | LMG 18957 <sup>T</sup>  | MT637259       | MT637287 | MT637315       | MT637342 | MT637370 | MT637398 |
| <i>P. gallinarii</i>        | CCUG 57736 <sup>T</sup> | MT637260       | MT637288 | MT637316       | MT637343 | MT637371 | MT637399 |
| <i>P. glaciei</i>           | JCM 15115 <sup>T</sup>  | MT637261       | MT637289 | MT637317       | MT637344 | MT637372 | MT637400 |
| <i>P. pullorum</i>          | LMG 28095 <sup>T</sup>  | MT637262       | MT637290 | - <sup>b</sup> | MT637345 | MT637373 | MT637401 |
| <i>P. asaccharolyticum</i>  | CCUG 46016 <sup>T</sup> | MT637263       | MT637291 | MT637318       | MT637346 | MT637374 | MT637402 |
| <i>P. kiredjianiae</i>      | DSM 19762 <sup>T</sup>  | MT637264       | MT637292 | MT637319       | MT637347 | MT637375 | MT637403 |
| <i>P. lubricantis</i>       | CCUG 56963 <sup>T</sup> | MT637265       | MT637293 | MT637320       | MT637348 | MT637376 | MT637404 |
| <i>P. saccharolyticum</i>   | CCUG 33852 <sup>T</sup> | MT637266       | MT637294 | MT637321       | MT637349 | MT637377 | MT637405 |

<sup>a</sup> MLSA data retrieved from Brucella PubMLST database

<sup>b</sup> Sequence supported by whole genome sequencing data

**Table S4.2.** NCBI GenBank accession numbers for MLSA data generated for atypical *Brucella* sp. strains

| Strain ID | Source                                               | Reference                  | <i>gpd</i> | <i>dnaK</i> | <i>trpE</i> | <i>csdB</i> | <i>leuA</i> | <i>acnA</i> |
|-----------|------------------------------------------------------|----------------------------|------------|-------------|-------------|-------------|-------------|-------------|
| BO2       | Human lung biopsy                                    | Tiller et al., 2010a       | _a         | _a          | _a          | _a          | _a          | _a          |
| 83/13     | Australian rodent                                    | -                          | _a         | _a          | _a          | _a          | _a          | _a          |
| 83/4      | Australian rodent                                    | -                          | _a         | _a          | _a          | _a          | _a          | _a          |
| NF2653    | Australian rodent                                    | Wattam et al., 2012        | _b         | _b          | _b          | _b          | _b          | _b          |
| 09RB8471  | African bull frog ( <i>Pyxicephalus edulis</i> )     | Al Dahouk et al., 2017     | _a         | _a          | _a          | MT637406    | MT637413    | MT637420    |
| 09RB8910  | African bull frog ( <i>Pyxicephalus edulis</i> )     | Al Dahouk et al., 2017     | _a         | _a          | _a          | MT637407    | MT637414    | MT637421    |
| 09RB8913  | African bull frog ( <i>Pyxicephalus edulis</i> )     | Al Dahouk et al., 2017     | _a         | _a          | _a          | MT637408    | MT637415    | MT637422    |
| 10RB9205  | African bull frog ( <i>Pyxicephalus edulis</i> )     | Al Dahouk et al., 2017     | _a         | _a          | _a          | MT637409    | MT637416    | MT637423    |
| 10RB9213  | African bull frog ( <i>Pyxicephalus edulis</i> )     | Al Dahouk et al., 2017     | _a         | _a          | _a          | MT637410    | MT637417    | MT637424    |
| 10RB9215  | African bull frog ( <i>Pyxicephalus edulis</i> )     | Al Dahouk et al., 2017     | _a         | _a          | _a          | MT637411    | MT637418    | MT637425    |
| 141012304 | Bluespotted ribbontail ray ( <i>Taeniura lymma</i> ) | Eisenberg et al., 2016     | _b         | _b          | _b          | _b          | _b          | _b          |
| B13-0095  | Pac-Man frog ( <i>Ceratophrys ornata</i> )           | Soler-Llorens et al., 2016 | _b         | _b          | _b          | _b          | _b          | _b          |
| UK8/14    | Whites tree frog ( <i>Litoria caerulea</i> )         | Whatmore et al. 2015       | _a         | _a          | _a          |             |             |             |

<sup>a</sup> MLSA data retrieved from Brucella PubMLST database

<sup>b</sup> MLSA data retrieved from whole genome assemblies (GenBank assembly accession numbers: 141012304: GCA\_900095155; B13-0095: GCA\_001742815; NF2653: GCA\_000177155)

**Table S4.3.** NCBI GenBank accession numbers for MLSA data and 16S sequences (where applicable) generated for field strains

| Strain ID <sup>(a)</sup> | Identity <sup>(b)</sup>     | 16S | <i>gpd</i> | <i>dnaK</i> | <i>trpE</i> | <i>csdB</i> | <i>leuA</i> | <i>acnA</i> |
|--------------------------|-----------------------------|-----|------------|-------------|-------------|-------------|-------------|-------------|
| CCM 7036 (D)             | <i>O. intermedium</i>       | -   | MT637427   | MT637477    | MT637527    | MT637577    | MT637627    | MT637677    |
| CCUG 1047 (D)            | <i>O. anthropi</i>          | -   | MT637428   | MT637478    | MT637528    | MT637578    | MT637628    | MT637678    |
| CCUG 12860 (D)           | <i>O. anthropi</i>          | -   | MT637429   | MT637479    | MT637529    | MT637579    | MT637629    | MT637679    |
| CCUG 16508 (D)           | <i>O. anthropi</i>          | -   | MT637430   | MT637480    | MT637530    | MT637580    | MT637630    | MT637680    |
| CCUG 17894 (D)           | <i>O. anthropi</i>          | -   | MT637431   | MT637481    | MT637531    | MT637581    | MT637631    | MT637681    |
| CCUG 1821 (D)            | <i>O. tritici</i>           | -   | MT637432   | MT637482    | MT637532    | MT637582    | MT637632    | MT637682    |
| CCUG 29689 (D)           | <i>O. tritici</i>           | -   | MT637433   | MT637483    | MT637533    | MT637583    | MT637633    | MT637683    |
| CCUG 32009 (D)           | <i>O. anthropi</i>          | -   | MT637434   | MT637484    | MT637534    | MT637584    | MT637634    | MT637684    |
| CCUG 33786 (D)           | <i>O. anthropi</i>          | -   | MT637435   | MT637485    | MT637535    | MT637585    | MT637635    | MT637685    |
| CCUG 34735 (D)           | <i>O. pseudintermedium</i>  | -   | MT637436   | MT637486    | MT637536    | MT637586    | MT637636    | MT637686    |
| CCUG 39736 (D)           | <i>O. intermedium</i>       | -   | MT637437   | MT637487    | MT637537    | MT637587    | MT637637    | MT637687    |
| CCUG 43465 (D)           | <i>O. pseudintermedium</i>  | -   | MT637438   | MT637488    | MT637538    | MT637588    | MT637638    | MT637688    |
| CCUG 43892 (D)           | <i>O. pseudogrignonense</i> | -   | MT637439   | MT637489    | MT637539    | MT637589    | MT637639    | MT637689    |
| CCUG 7349 (D)            | <i>O. anthropi</i>          | -   | MT637440   | MT637490    | MT637540    | MT637590    | MT637640    | MT637690    |
| CLM26 (D)                | <i>O. anthropi</i>          | -   | MT637441   | MT637491    | MT637541    | MT637591    | MT637641    | MT637691    |
| CLM6 (D)                 | <i>O. anthropi</i>          | -   | MT637442   | MT637492    | MT637542    | MT637592    | MT637642    | MT637692    |
| DSM 20150 (D)            | <i>O. anthropi</i>          | -   | MT637443   | MT637493    | MT637543    | MT637593    | MT637643    | MT637693    |

|              |                       |   |          |          |          |          |          |          |
|--------------|-----------------------|---|----------|----------|----------|----------|----------|----------|
| LMG 2134 (D) | <i>O. tritici</i>     | - | MT637444 | MT637494 | MT637544 | MT637594 | MT637644 | MT637694 |
| LMG 2136 (D) | <i>O. anthropi</i>    | - | MT637445 | MT637495 | MT637545 | MT637595 | MT637645 | MT637695 |
| LMG 3298 (D) | <i>O. anthropi</i>    | - | MT637446 | MT637496 | MT637546 | MT637596 | MT637646 | MT637696 |
| LMG 3306 (D) | <i>O. intermedium</i> | - | MT637447 | MT637497 | MT637547 | MT637597 | MT637647 | MT637697 |
| LMG 35 (D)   | <i>O. anthropi</i>    | - | MT637448 | MT637498 | MT637548 | MT637598 | MT637648 | MT637698 |
| LMG379 (D)   | <i>O. intermedium</i> | - | MT637449 | MT637499 | MT637549 | MT637599 | MT637649 | MT637699 |
| LMG 394 (D)  | <i>O. anthropi</i>    | - | MT637450 | MT637500 | MT637550 | MT637600 | MT637650 | MT637700 |
| LMG 401 (D)  | <i>O. tritici</i>     | - | MT637451 | MT637501 | MT637551 | MT637601 | MT637651 | MT637701 |
| LMG 5425 (D) | <i>O. intermedium</i> | - | MT637452 | MT637502 | MT637552 | MT637602 | MT637652 | MT637702 |
| LMG 5426 (D) | <i>O. intermedium</i> | - | MT637453 | MT637503 | MT637553 | MT637603 | MT637653 | MT637703 |
| LMG 5442 (D) | <i>O. anthropi</i>    | - | MT637454 | MT637504 | MT637554 | MT637604 | MT637654 | MT637704 |
| LMG 5444 (D) | <i>O. anthropi</i>    | - | MT637455 | MT637505 | MT637555 | MT637605 | MT637655 | MT637705 |
| LMG 5446 (D) | <i>O. intermedium</i> | - | MT637456 | MT637506 | MT637556 | MT637606 | MT637656 | MT637706 |
| RR (D)       | <i>O. intermedium</i> | - | MT637457 | MT637507 | MT637557 | MT637607 | MT637657 | MT637707 |
| OgA9c (D)    | <i>O. grignonense</i> | - | MT637458 | MT637508 | MT637558 | MT637608 | MT637658 | MT637708 |
| TA13 (D)     | <i>O. intermedium</i> | - | MT637459 | MT637509 | MT637559 | MT637609 | MT637659 | MT637709 |
| TA93 (D)     | <i>O. tritici</i>     | - | MT637460 | MT637510 | MT637560 | MT637610 | MT637660 | MT637710 |
| TD30 (D)     | <i>O. intermedium</i> | - | MT637461 | MT637511 | MT637561 | MT637611 | MT637661 | MT637711 |
| WS1830 (D)   | <i>O. tritici</i>     | - | MT637462 | MT637512 | MT637562 | MT637612 | MT637662 | MT637712 |

|                 |                              |          |          |          |          |          |          |          |
|-----------------|------------------------------|----------|----------|----------|----------|----------|----------|----------|
| WS1846 (D)      | <i>O. oryzae</i>             | -        | MT637463 | MT637513 | MT637563 | MT637613 | MT637663 | MT637713 |
| R5/07 (UK)      | <i>Pseudochrobactrum sp.</i> | MT625679 | MT637464 | MT637514 | MT637564 | MT637614 | MT637664 | MT637714 |
| R16/08-3UT (UK) | <i>Pseudochrobactrum sp.</i> | MT625680 | MT637465 | MT637515 | MT637565 | MT637615 | MT637665 | MT637715 |
| R17/08-1UD (UK) | <i>Pseudochrobactrum sp.</i> | MT625681 | MT637466 | MT637516 | MT637566 | MT637616 | MT637666 | MT637716 |
| R22/05 (UK)     | <i>Pseudochrobactrum sp.</i> | MT625682 | MT637467 | MT637517 | MT637567 | MT637617 | MT637667 | MT637717 |
| R24/05 (UK)     | <i>Pseudochrobactrum sp.</i> | MT625683 | MT637468 | MT637518 | MT637568 | MT637618 | MT637668 | MT637718 |
| UK2/05 (UK)     | <i>Pseudochrobactrum sp.</i> | MT625684 | MT637469 | MT637519 | MT637569 | MT637619 | MT637669 | MT637719 |
| UK3/11-1 (UK)   | <i>Paenochrobactrum sp.</i>  | MT625685 | MT637470 | MT637520 | MT637570 | MT637620 | MT637670 | MT637720 |
| UK5/07 (UK)     | <i>Pseudochrobactrum sp.</i> | MT625686 | MT637471 | MT637521 | MT637571 | MT637621 | MT637671 | MT637721 |
| UK14/09 (UK)    | <i>Pseudochrobactrum sp.</i> | MT625687 | MT637472 | MT637522 | MT637572 | MT637622 | MT637672 | MT637722 |
| UK20/09 (UK)    | <i>Pseudochrobactrum sp.</i> | MT625688 | MT637473 | MT637523 | MT637573 | MT637623 | MT637673 | MT637723 |
| UK34/07-2 (UK)  | <i>Pseudochrobactrum sp.</i> | MT625689 | MT637474 | MT637524 | MT637574 | MT637624 | MT637674 | MT637724 |
| VLA07/50 (UK)   | <i>Ochrobactrum sp.</i>      | MT625690 | MT637475 | MT637525 | MT637575 | MT637625 | MT637675 | MT637725 |
| VLA10/07-E (UK) | <i>Pseudochrobactrum sp.</i> | MT625691 | MT637476 | MT637526 | MT637576 | MT637626 | MT637676 | MT637726 |

<sup>(a)</sup> Strains denoted (D) provided by Bundeswehr Institute of Microbiology (Munich, Germany); strains denoted (UK) obtained by the Animal and Plant Health Agency (Weybridge, UK)

<sup>(b)</sup> Identity based on published data (German strains: see Scholz et al., 2008b) or analysis of 16S rRNA sequence (UK strains)
